1    **MAGNITUDE OF NEONATAL HYPOGLYCEMIA AND ITS ASSOCIATED FACTORS**  
2            **AMONG NEONATES ADMITTED TO NEONATAL INTENSIVE CARE UNIT AT**  
3                    **HAWASSA CITY PUBLIC HOSPITALS, ETHIOPIA, 2023.**

4  
5

6    **Selam Tadele<sup>1\*</sup>, Wegene Jembere<sup>2</sup>, Mastewal Aschale<sup>2</sup>, Tewodros Mulugeta<sup>1</sup>, Samuel**  
7    **Jigso<sup>1</sup>, Mequanint Ayehu<sup>1</sup>, Migbar Sibhat<sup>1</sup>**

8  
9  
10  
11

12    <sup>1</sup> Department of Nursing, College of Medicine and College of Health Science, Dilla University,  
13    Dilla, Ethiopia

14    <sup>2</sup> School of nursing, College of medicine and health Sciences, Hawassa University, Hawassa,  
15    Ethiopia

16  
17  
18  
19  
20  
21  
22  
23

24    \*Corresponding author  
25    E-mail: [selmesty1216@gmail.com](mailto:selmesty1216@gmail.com)

26  
27  
28  
29

30

## Abstract

31

32 **Background:** Neonatal hypoglycemia is one of the most common metabolic abnormalities seen  
33 in newborns. It is a major contributing factor to neonatal morbidity and mortality. Globally, it affects  
34 around 5–15% of all babies and approximately 50% of at-risk babies.. In Ethiopia, neonatal  
35 hypoglycemia is frequently diagnosed and one of the commonest causes of admission to the  
36 neonatal intensive care unit. Nevertheless, documented records regarding its magnitude and  
37 factors associated with hypoglycemia are scarce in the study area. Therefore we aimed to assess  
38 the magnitude of neonatal hypoglycemia and its associated factors among neonates admitted to  
39 the neonatal intensive care unit at Hawassa City Public Hospitals, Ethiopia.

40 **Method:** Institution-based cross-sectional study was conducted from April 20 – June 20,  
41 2023 among 293 neonates. A systematic random sampling technique was used to reach the study  
42 subjects. The data was collected through face-to-face interviews and card review by using  
43 structured pretested questionnaire and analyzed using SPSS software version 25. A multivariable  
44 logistic regression model was used to determine factors significantly associated with neonatal  
45 hypoglycemia with adjusted odds ratio, p-values <0.05 at 95% confidence interval (CI).

46 **Result:** The magnitude of neonatal hypoglycemia was found 16.6%. Variables significantly  
47 associated with the occurrence of neonatal hypoglycemia were: Diabetes mellitus [AOR=9.8,  
48 95%CI (3.08-31.37)], perinatal asphyxia [AOR=2.87, 95%CI (1.07-7.72)], delayed initiation of  
49 breastfeeding [AOR=2.63, 95%CI (1.04-6.6)] and hypothermia [AOR=3.8, 95%CI (1.6-9.1)].

50 **Conclusion:** In this study the magnitude of neonatal hypoglycemia among neonates was high.  
51 Neonates with hypothermia, perinatal asphyxia, and delayed initiation of breastfeeding and  
52 maternal history of diabetes mellitus have an increased risk of developing hypoglycemia. Hence,  
53 Health care providers who are working on delivery and neonatal care should focus on early  
54 identification and management of these identified factors.

55 **Keywords:** neonate, diabetes mellitus, hypoglycemia, Blood glucose

## 1. Introduction

56

57 Neonatal hypoglycemia is defined as an abnormally low blood glucose level (1). There has been  
58 much controversy about the ‘numerical’ definition of neonatal hypoglycemia. Although the most  
59 often used definition of newborn hypoglycemia is a glucose concentration of 47 mg/dl (2.6

60 mmol/l), (2, 3), in Ethiopia it is clinically defined as a blood glucose level less than 40 mg/dl  
61 (4)..

62 It is the most prevalent metabolic abnormality in the newborn period (5), which is a major  
63 contributing factor to neonatal morbidity and mortality(6). Globally, it affects around 5–15% of  
64 all babies (7, 8) and approximately 50% of at-risk babies and is associated with a range of  
65 adverse consequences (9)..

66 In resource-limited settings, evidence shows there is widespread neonatal hypoglycemia, even  
67 though in some countries there is a shortage of advanced techniques for hypoglycemia detection  
68 and an absence of routine assessment for hypoglycemia. In African countries Nigeria and  
69 Uganda have an incidence of 32.7% and 2.2 % respectively (6, 10). In Ethiopia, the magnitude  
70 ranges from 15%-25% (11, 12).

71 If left untreated, severe and prolonged hypoglycemia can have a devastating neurologic and  
72 developmental outcome which includes cerebral palsy, long-term neurodevelopmental  
73 disabilities, mental retardation, epilepsy, personality disorders, and even death (13).

74 Despite these devastating health impacts of neonatal hypoglycemia, organized data regarding the  
75 magnitude of hypoglycemia and the factors that predict its occurrence were scarce in Ethiopia.  
76 Furthermore, we couldn't find a single study to investigate this issue in our study area. Hence,  
77 this study aims to determine the magnitude of neonatal hypoglycemia, and factors associated  
78 with it among neonates admitted to neonatal intensive care units at Hawassa City Public  
79 Hospitals, Sidama Regional State, Ethiopia.

## 80 **3. Methods and Materials**

### 81 **3.1. Study design and area**

82 An institutional-based cross-sectional study was conducted in Hawassa City from April 20- June  
83 20, 2023. Hawassa city is the capital city of the newly emerged Sidama National Regional State  
84 and it is located 275 km south of far from Addis Ababa, Ethiopia. There are 9 hospitals (4 public  
85 and 5 private) in Hawassa City, as well as 12 public health centers and 18 health posts. The four  
86 public hospitals are Hawassa University Comprehensive Specialized Hospital (14), Adare

87 General Hospital (15), Motite Furra Primary Hospital and Hawela Tula Primary Hospital  
88 (HTPH). Only the three hospitals have NICU. All three hospitals follow Ethiopia's National  
89 Standard Treatment Guideline for Hospitals(16).

### 90 **3.2. Source population and Study population**

#### 91 **Source population**

- 92 • All neonates who were admitted to the neonatal intensive care units of Hawassa city  
93 public hospitals are the source population

#### 94 **Study population**

- 95 • All randomly selected neonates admitted to the neonatal intensive care unit of selected  
96 public hospitals during the study period were the study population

### 99 **3.3. Inclusion and Exclusion Criteria**

100 All neonates who were admitted to NICU in the selected hospitals during the data collection  
101 period were included and neonates admitted without mothers or caregivers were excluded from  
102 the study.

### 103 **3.4. Sample size calculation**

104 The sample size was determined by using single population proportion formula by taking the  
105 prevalence of neonatal hypoglycemia from the previous study done in Hiwot Fana Hospital, East  
106 Harerge, Ethiopia which is 21.2% (11). Considering the parameters of the single population  
107 proportion formula which are a marginal error of 0.05, a 95% confidence interval, and a p-value  
108 of 0.21 assuming a 15% non-response rate.

109  $P = \text{proportion hypoglycemia} = 21.2\%$

110  $d = \text{margin of error } 5\%$

111  $Z_{\alpha/2} = \text{the corresponding } Z \text{ score of } 95\% \text{ CI}$

112  $N = \text{Sample size}$

113  $N = \frac{Z^2 (a/2)^2 P (1-P)}{d^2}$

114  $d^2 = 0.0025$

115  $= (1.96)^2 * 0.21 * (1 - 0.21) = 255$

116 By adding a 15 % non-response rate, a total of 293 participants were included in the study.

### 117 **3.5. Sampling technique**

118 Three public hospitals (Hawassa University Comprehensive Specialized Hospital, Adare General  
119 Hospital, and Tulla Primary Hospital) are found in Hawassa City which had NICU. Motite Furra  
120 Primary Hospital was excluded because it does not provide NICU service. To select the study  
121 participants from each hospital, the proportional allocation formula was used based on caseloads  
122 by fixing two months of admission before the survey. Simple random sampling was used to  
123 select the first participant and systematic random sampling was used for the next consecutive  
124 samples.

### 125 **3.6. Operational definition**

126 **Magnitude of hypoglycemia:** The number of neonates who develop hypoglycemia at admission  
127 to NICU during the study period.

128 **Neonatal hypoglycemia:** - A measure of blood glucose level less than 40 mg/dl(4).

129 **ANC follow up:** any history of visit or follow up during current pregnancy at any health  
130 institution for check-up of pregnancy recorded on the chart.

131 **Hypothermia:** A neonate's axillary body temperature below 36.5 o C(4).

132 **Perinatal asphyxia:** was considered when the 5th minute APGAR score is less than 7 or a  
133 neonate did not cry immediately at birth or resuscitation needed at birth and documented on the  
134 chart(4).

### 135 **3.7. Data collection tools and procedures**

136 The data was collected using the tool adopted from the previous studies done at Addis Abeba  
137 (Tikur Anbessa and St., Paulos), and Harar, Hiwot Fana Hospital (Fikirte Kasaye, 2021). A  
138 structured interviewer-based questionnaire and structured checklist was used to collect data for  
139 maternal socio-demographic factors and obstetric-related characteristics, and neonatal related  
140 factors was taken using a structured checklist from the medical records of a neonate during the  
141 data collection period. The data was collected from 20<sup>th</sup> April, 2023 to June 20, 2023.

142 Regarding the blood glucose level of the neonate, a blood sample was taken from the neonate,  
143 and their blood glucose level was measured using a glucometer. Blood glucose was determined

144 using the Precisa Active Blood Glucose Meter at the admission. Blood glucose results were  
145 provided in mg/dl. Neonates who were found to be hypoglycemic were managed as per the  
146 NICU protocol. For the data collection, three data collectors and one supervisor who were BSC  
147 nurses and who had research experience were chosen. Before data collection one-day training  
148 was given for data collectors and supervisors.

### 149 **3.8. Data management and analysis**

150 Data was checked for completeness and consistency and then it was cleaned, coded and entered  
151 using Epi data version 3.1 and it was exported to SPSS software version 25 for analysis. Cross-  
152 tabulation was done among dependent variables and independent variables. Frequencies,  
153 Percentage, mean and standard deviation were used to summarize descriptive statistics. Binary  
154 logistic regression and multiple logistic regression were done at p-value <0.25 and <0.05  
155 respectively with a 95% Confidence interval. Hosmer and Lomeshow goodness of fit test was  
156 done to check model fitness and the model was fitted. In addition, a multi-collinearity or  
157 tolerance test was done with all variables to solve the issue of confounding effects among  
158 independent variables. Finally tables and charts were used for data presentation.

### 159 **3.9. Quality assurance technique**

160 The questionnaire was prepared in English and translated to Amharic and sidammu-afu and then  
161 retranslated to English to check for inconsistency. The data collection tool was pretested on 5%  
162 two weeks before the actual data collection period and modifications were made accordingly.  
163 The trained data collectors were assigned to selected hospitals and they collected the data.  
164 During the data collection time, close supervision and monitoring was carried out by supervisors  
165 and investigator to ensure the quality of the data. Daily evaluations of the data for completeness  
166 and encountered difficulties at the time of data collection were attended accordingly. Finally, all  
167 the collected data was checked by the supervisor and investigator for completeness and  
168 consistency during the data management, storage, and analysis.

### 169 **3.10. Ethical considerations**

170 Ethical clearance was obtained from the Hawassa University College of Medicine and Health  
171 Science institutional review board (Ref Number: IRB/313/15). Then officials at different levels  
172 in the Hawassa city administration health office and hospitals were communicated through  
173 letters. Since neonates could not speak any information, the neonates' mothers or guardian were

174 informed about the purpose of the study and written informed consent was obtained to confirm  
175 willingness. They were notified that they had the right to refuse or terminate at any point of the  
176 interview. The study was conducted as per the declaration of Helsinki. Confidentiality of the  
177 information was secured throughout the study process.

## 178 4. Result

### 179 4.1. Descriptive statistics of the result

#### 180 4.1.1. Socio-demographic characteristics of the respondents

181 A total of 271 neonates were included with an overall response rate of 92.5%. The mean age of  
182 the mothers was 29.1 ( $\pm 5.29$ ) years. The majority of participants were living in urban areas  
183 179(66.6%). Regarding the educational status of the mothers, a higher proportion of mothers  
184 134(49.5%) completed secondary educational level. Concerning the marital status, 244 (90%)  
185 mothers were married. Whereas, five (1.8%) and thirteen (4.8%) mothers were widowed and  
186 divorced respectively. (Table 1)

187 **Table 1:-** Socio-demographic characteristics of the mothers of neonates on admission to the  
188 neonatal intensive care unit in Hawassa City Public Hospitals, Ethiopia 2023. (n=271)

| Variable              | Category            | Frequency (n=271) | Percentage (%) |
|-----------------------|---------------------|-------------------|----------------|
| Age group (in a year) | $\leq 24$           | 58                | 21.4           |
|                       | 25-34               | 163               | 60.1           |
|                       | $\geq 35$           | 50                | 18.5           |
| Residence             | Urban               | 179               | 66.1           |
|                       | Rural               | 92                | 33.9           |
| Educational status    | No formal education | 67                | 24.7           |
|                       | Primary education   | 70                | 25.8           |
|                       | Secondary education | 75                | 27.7           |
|                       | College and above   | 59                | 21.8           |
| Occupation            | Government employee | 57                | 21.0           |
|                       | private employee    | 51                | 18.8           |
|                       | Merchant            | 50                | 18.5           |
|                       | Daily Laborer       | 17                | 6.3            |
|                       | Housewife           | 86                | 31.7           |
|                       | Other*              | 10                | 3.7            |
| Marital status        | Single              | 7                 | 2.6            |

---

|          |     |      |
|----------|-----|------|
| Married  | 246 | 90.8 |
| Widowed  | 5   | 1.8  |
| Divorced | 13  | 4.8  |

---

189 **Key:** Others \*= student, street women

190 **4.1.2. Description of maternal and obstetric characteristics**

191 In this study, the majority of 234(86.3%) of the mothers had ANC follow-up during the current  
192 pregnancy. Of these, 115(45.8%) had at least four ANC follow up. About 194 (71.9%) mothers  
193 had more than one child. Regarding the place of delivery, the majority of the neonates were  
194 delivered at health institutions. of which 221(72.3%) were delivered at the hospital followed by  
195 59(21.8%) at health centers. Concerning obstetrics history, 14(5.2%) of the mother had  
196 prolonged labor and higher proportions of the neonate 166(61.6%) were delivered through  
197 spontaneous vaginal delivery. Moreover, 121(44.6%) and 122(45%) of the delivery process were  
198 conducted by midwives and medical Doctors (general practitioners, residents and specialists)  
199 respectively (Table 2).

200 As shown in Table 2, Around 26(9.6%) of mothers had diabetes mellitus. Among those 13  
201 (4.8%) of the mothers had gestational Diabetes mellitus and 13 (4.8%) of them had pre-  
202 gestational diabetes mellitus. Regarding pregnancy-induced hypertension, 41(15.1%) of mothers  
203 had developed it and 20(7.4%) of the mothers were preeclamptic. Regarding other chronic  
204 illnesses, 15(5.5%) of the mothers were hypertensive and 10(3.7%) were HIV/AIDs clients  
205 (Table 2).

206



207 **Table 2:** Obstetric-related factors of neonatal hypoglycemia among neonates on admission to  
 208 neonatal intensive care unit in Hawassa City public Hospitals, Ethiopia, 2023. (n=271)

| Variable                       | Category                            | Frequency (n=271) | Percentage |
|--------------------------------|-------------------------------------|-------------------|------------|
| ANC                            | Had no ANC follow-up                | 37                | 13.7       |
|                                | Had 1-3 ANC follow-up               | 115               | 42.4       |
|                                | Had >4 ANC follow-up                | 119               | 43.9       |
| Number of children(parity)     | 1 child(Primi-parity)               | 77                | 28.4       |
|                                | More than 1 children (Multi-parity) | 194               | 71.9       |
| Prolonged labor                | Yes                                 | 14                | 5.2        |
|                                | No                                  | 257               | 94.8       |
| Place of delivery              | Home                                | 16                | 5.9        |
|                                | Health Center                       | 59                | 21.8       |
|                                | Hospital                            | 196               | 72.3       |
| Position                       | Cephalic                            | 221               | 81.5       |
|                                | Non-cephalic                        | 50                | 18.5       |
| Mode of delivery               | Spontaneous vaginal delivery        | 166               | 61.3       |
|                                | Assisted vaginal delivery           | 31                | 11.4       |
|                                | Cesarean Section                    | 74                | 27.3       |
| Premature rupture of membrane  | Yes                                 | 58                | 21.4       |
|                                | No                                  | 213               | 78.6       |
| Type of pregnancy              | Single                              | 251               | 92.6       |
|                                | Twin and above                      | 20                | 7.4        |
| Conducted by                   | Nurse                               | 12                | 4.4        |
|                                | Midwives                            | 121               | 44.6       |
|                                | Medical Doctor                      | 122               | 45         |
|                                | Traditional birth attendant         | 16                | 5.9        |
| Diabetes Mellitus              | Yes                                 | 26                | 9.6        |
|                                | No                                  | 245               | 90.4       |
| Pre-pregnancy DM               | Yes                                 | 13                | 4.8        |
|                                | No                                  | 258               | 95.2       |
| Gestational DM                 | Yes                                 | 13                | 4.8        |
|                                | No                                  | 258               | 95.2       |
| Pregnancy-induced hypertension | Yes                                 | 41                | 15.1       |
|                                | No                                  | 230               | 84.9       |
| Preeclampsia                   | Yes                                 | 20                | 7.4        |
|                                | No                                  | 251               | 92.6       |
| Eclampsia                      | Yes                                 | 31                | 11.4       |
|                                | No                                  | 240               | 88.6       |
| Chronic Hypertension           | Yes                                 | 15                | 5.5        |
|                                | No                                  | 256               | 94.5       |
| HIV/AIDs                       | Yes                                 | 10                | 3.7        |
|                                | No                                  | 261               | 96.3       |

209

210 **4.1.3. Neonatal-related variables**

211 Among admitted neonates around 156 (57.6%) were male and more than half 171 (63.1%) were  
212 gestational age between 37-42 weeks. About 112 (41.3%) of them had birth weights between  
213 2500gm - 4000gm. The majority of the neonates 216 (79.7%) were admitted within 24hr after  
214 delivery. Around, 119 (43.9%) of the neonates had hypothermia. Regarding feeding initiation  
215 time 99 (36.5%) of neonates started feeding within one hour (Table 3).

216 Concerning the neonatal-related comorbid illness, 241(88.9%) of neonates were admitted with  
217 comorbid illness. Among those 130(48%) had neonatal sepsis, 52(19.2%) had birth asphyxia,  
218 38(14%) had respiratory distress syndrome, 30(11.1%) had Meconium Aspiration Syndrome and  
219 53(19.6%) had jaundice.

220

221

222

223

224

225

226

227

228

229

230

231

232 **Table 3.** Neonatal-related predictors of hypoglycemia among neonates on admission to neonatal  
 233 intensive care unit in Hawassa City public Hospitals, Ethiopia 2023. (n=271)

| Variable                             | Category   | Frequency (n=271) | Percentage |
|--------------------------------------|------------|-------------------|------------|
| Sex                                  | male       | 156               | 57.6       |
|                                      | female     | 115               | 42.4       |
| GA                                   | <37 weeks  | 96                | 35.4       |
|                                      | 37-42 week | 171               | 63.1       |
|                                      | >42 weeks  | 4                 | 1.5        |
| Birth weight                         | 2500-3999  | 118               | 43.5       |
|                                      | <2500      | 112               | 41.3       |
|                                      | ≥4000      | 28                | 10.3       |
| Age at admission                     | <24 hours  | 213               | 78.6       |
|                                      | ≥24 hours  | 58                | 21.4       |
| Hypothermia                          | Yes        | 119               | 43.9       |
|                                      | No         | 152               | 56.1       |
| Hypoglycemia                         | Yes        | 45                | 16.6       |
|                                      | No         | 226               | 83.4       |
| Time of initiation of breast feeding | ≤1 Hours   | 106               | 39.1       |
|                                      | >1 Hours   | 165               | 60.9       |
| Is there any comorbid illness        | Yes        | 241               | 88.9       |
|                                      | No         | 30                | 11.1       |
| Neonatal sepsis                      | Yes        | 130               | 48.0       |
|                                      | No         | 141               | 52.0       |
| Birth asphyxia                       | Yes        | 53                | 19.6       |
|                                      | No         | 218               | 80.4       |
| Respiratory distress syndrome        | Yes        | 38                | 14.0       |
|                                      | No         | 233               | 86.0       |
| Meconium Aspiration Syndrome         | Yes        | 30                | 11.1       |
|                                      | No         | 241               | 88.9       |
| Jaundice                             | Yes        | 53                | 19.6       |
|                                      | No         | 218               | 80.4       |
| Birth Trauma                         | Yes        | 25                | 9.2        |
|                                      | No         | 246               | 90.8       |
| congenital anomaly                   | Yes        | 22                | 8.1        |
|                                      | No         | 249               | 91.9       |

234 **4.2. The Magnitude of neonatal hypoglycemia**

235 In this study, the overall magnitude of neonatal hypoglycemia was observed to be 45(16.6%)  
 236 (Figure 1).

237

### 4.3. Factors associated with Neonatal Hypoglycemia

238 The bivariate logistic regression showed that diabetes mellitus, parity, antenatal care visits,  
 239 prolonged labor, and preeclampsia were selected among maternal-related factors. In the same  
 240 way, the age of the neonate, birth weight, neonatal sepsis, birth asphyxia, hypothermia, and time  
 241 of initiation of breastfeeding were selected from neonatal-related risk factors.

242 The multivariable logistic regression result showed that those mothers who have had Diabetes  
 243 mellitus were about ten times to have newborns suffering from neonatal hypoglycemia compared  
 244 with those who had not [AOR=9.8, 95% CI(3.08-31.37)]. Neonates born with Birth asphyxia  
 245 were nearly three times more likely to be hypoglycemic than their counterpart [AOR=2.87, 95%  
 246 CI (1.07-7.72)]. Regarding the time of initiation of breastfeeding, neonates who start  
 247 breastfeeding after one hour of delivery were approximately three times more likely to develop  
 248 neonatal hypoglycemia than those who start within one hour [AOR=2.63, 95% CI(1.04-6.6)].  
 249 Similarly, neonates who develop neonatal hypothermia were nearly four times to be  
 250 hypoglycemic than their counterparts [AOR=3.8, 95%CI (1.6-9.1)]. (Table-4)

251 Antenatal care visits, parity, prolonged labor, preeclampsia, birth weight, neonatal sepsis, and  
 252 age at admission were not found to have statistically significant association with neonatal  
 253 hypoglycemia in this study.

254 **Table 4.** Factors associated with Hypoglycemia among neonates on admission to neonatal  
 255 intensive care unit in Hawassa public Hospitals, Ethiopia 2023. (n=271)

| Variable           | Category             | Hypoglycemia (n=271) |     | COR             | AOR              |
|--------------------|----------------------|----------------------|-----|-----------------|------------------|
|                    |                      | Yes                  | No  |                 |                  |
| DM                 | 1. Yes               | 14                   | 12  | 8.05(3.4-18.99) | 9.8(3.08-31.37)* |
|                    | 2. No                | 31                   | 214 | 1               | 1                |
| Age of the neonate | 1. < 24hr            | 32                   | 181 | 1               | 1                |
|                    | 2. >24 hr            | 13                   | 45  | 1.63(0.79-3.36) | 2.407(0.92-6.30) |
| ANC follow up      | 1. No ANC followup   | 10                   | 27  | 1.95(0.8-4.68)  | 2.35(0.73-7.62)  |
|                    | 2. 1-3 ANC follow up | 16                   | 99  | 0.85(0.4-1.75)  | 1.06(0.44-2.53)  |
|                    | 3. > 4 ANC follow up | 19                   | 100 | 1               | 1                |

|                                      |                         |    |     |                 |                  |
|--------------------------------------|-------------------------|----|-----|-----------------|------------------|
| Hypothermia                          | 1. Yes                  | 29 | 90  | 2.74(1.41-5.33) | 3.8(1.6-9.1)*    |
|                                      | 2. No                   | 16 | 136 | 1               | 1                |
| Birth weight                         | 1. 2500-3999            | 16 | 102 | 1               | 1                |
|                                      | 2. <2500                | 18 | 94  | 1.22(0.59-2.53) | 0.82(0.32-2.1)   |
|                                      | 3. ≥4000                | 9  | 19  | 3.02(1.16-7.83) | 1.9(0.52-6.7)    |
| Prolonged labor                      | 1. Yes                  | 4  | 10  | 0.48(0.14-1.59) | 1.65(0.35-7.56)  |
|                                      | 2. No                   | 41 | 216 | 1               | 1                |
| Number of children (parity)          | 1. 1 child              | 17 | 60  | 1.68(0.86-3.29) | 1.34(0.56-3.2)   |
|                                      | 2. More than 1 children | 28 | 166 | 1               | 1                |
| Preeclampsia                         | 1. Yes                  | 7  | 13  | 3.02(1.13-8.05) | 2.2(0.64-7.3)    |
|                                      | 2. No                   | 38 | 213 | 1               | 1                |
| Perinatal asphyxia                   | 1. Yes                  | 14 | 39  | 2.17(1.06-4.45) | 2.87(1.07-7.72)* |
|                                      | 2. No                   | 32 | 187 | 1               | 1                |
| Sepsis                               | 1. Yes                  | 26 | 104 | 1.6(0.84-3.07)  | 1.76(0.77-4.05)  |
|                                      | 2. No                   | 19 | 122 | 1               | 1                |
| Delayed initiation of breast feeding | 1. Yes                  | 37 | 128 | 3.54(1.58-7.9)  | 2.63(1.04-6.6)*  |
|                                      | 2. No                   | 8  | 98  | 1               | 1                |

256 -\*p-value<0.05 significantly associated with neonatal hypoglycemia

## 257 5. Discussion

258 Hypoglycemia is one of a metabolic disturbance which occurs during the neonatal period.  
 259 Screening at-risk infants and the management of low blood glucose levels in the first hours to  
 260 days of life is a frequent issue in the care of newborn infants. If it is persistent and not detected  
 261 early, it could lead to adverse neurological complications and poor prognosis. So this study was  
 262 targeted to identify factors associated with neonatal hypoglycemia.

263 In this study, the prevalence of neonatal hypoglycemia at the admission point was 16.6% among  
 264 neonates in the Neonatal intensive care unit, in Hawassa city. This study is in line with a study  
 265 conducted in West Bengal and India which was 16.3% and 15.2% respectively (18, 19). On the

266 other hand the finding was lower than the study carried out in Ethiopia St. Paul at 25% and  
267 Nigeria at 32.7 % (10, 12). This might be due to that these two studies used a higher cut-off point  
268 to diagnose neonatal hypoglycemia which is 47mg/dl.

269 In contrast, the magnitude of neonatal hypoglycemia was higher than the study conducted in  
270 USA(3.2%)(20), India(8.2%) (21), Nigeria (11%) (22), and Madagascar (3.1%) (23). The  
271 possible reasons may be, because our study includes infants of diabetic mothers, neonates born  
272 from hypertensive mothers, and newborns with severe congenital malformation which were  
273 excluded in the above study areas. Another study done in Uganda showed a 2.2% prevalence,  
274 which is much lower compared to the current study (6). The possible explanation for this may be  
275 that the study conducted in Uganda was community-based which is different from institutional  
276 based and large number of study participants involved in the study.

277 Regarding factors associated with neonatal Hypoglycemia, Diabetes mellitus (gestational  
278 Diabetes mellitus Pre-diabetes mellitus), perinatal asphyxia, delayed initiation of breastfeeding  
279 and the presence of Hypothermia were independently associated with it.

280 The current study finding revealed that neonates born from mothers with diabetes mellitus were  
281 nearly ten times more likely to have hypoglycemia compared with non-diabetic mothers. This  
282 study finding was supported by the study done in Ethiopia (Addis Ababa Black Loin Hospital  
283 and Harer Hiwot Fana Hospital), South Africa, Bangladesh, and China (11, 17, 24-26). This  
284 finding was can be justified by the fact that infants of diabetic mothers have hyper-insulinemia  
285 caused by high maternal glucose levels and after birth when maternal glucose is withdrawn the  
286 baby may develop hypoglycemia(27).

287 In contrast, the study carried out in St. Paul's, Ethiopia, Indonesia and Israel, maternal DM was  
288 not found to be a contributing factor to neonatal hypoglycemia (12, 28, 29). The possible reason  
289 for maternal DM to be non-significant may be due to the intervention of early management of  
290 maternal DM. Another evidence for this variation may be due to absence or a small number of a  
291 mother with DM was found as a study participant.

292 Another factor that was found significantly associated with hypoglycemia was found to be  
293 perinatal asphyxia. Neonates born with perinatal asphyxia were nearly three times more likely to

294 have hypoglycemia compared with non-asphyxia neonates. A similar result was also reported in  
295 Indonesia which showed that those who have perinatal asphyxia have a three times risk of having  
296 hypoglycemia(28). Evidence from china and Colombia suggests that hypoglycemia was  
297 significantly related to perinatal asphyxia (30)(Cristo Colmenares et al., 2021). This may be due  
298 to the reason in perinatal asphyxia, increasing metabolic and energy demands are achieved  
299 transiently by increasing glucose production through glycogenolysis. Due to hypoxia, the infant  
300 switches to anaerobic metabolism, resulting in rapid exhaustion of glycogen stores,  
301 hypoglycemia, and lactic acedemia(31).

302 Hypothermia was found to be one of the significant risk factors associated with hypoglycemia in  
303 this study. Neonates with hypothermia were four times more likely to have hypoglycemia than  
304 non-hypothermic. Various evidence show that hypothermia is one of the major risk factor for  
305 hypoglycemia (11, 22, 24, 26). In a cross-sectional study in Ethiopia, Hiwot Fana Hospital and  
306 St. Paulo's Hospital the odds of developing risk of hypoglycemia in hypothermic neonates were  
307 three and two respectively (11, 12). After birth maintaining newborn body temperature is very  
308 important. When the baby gets cold the newborn uses up more glycogen to keep warm. Then  
309 the newborn must utilize glucose stores to keep warm, then the blood sugar drops and they  
310 become hypothermic along with hypoglycemic(32).

311 Delayed initiation of breastfeeding is a major contributing factor to neonatal hypoglycemia.  
312 Newborns that started initial breastfeeding after one hour had a three times higher chance of  
313 developing neonatal hypoglycemia compared with those who started within one hour. Similarly,  
314 research conducted in China, Uganda and Ethiopia Harer, late initiation of breastfeeding has  
315 shown that three times higher risk of developing hypoglycemia (6, 11, 24). This similarity can  
316 be due to the reason that neonates with delayed initiation of breastfeeding lacks the advantage  
317 early initiation of breastfeeding i.e. colostrum increases the blood glucose level within one hour  
318 and continuing breast feeding maintain infants at eu-glycemic state(33).

319

## 320 **6. Strengths and Limitations of the Study**

321 This study used primary data for blood glucose measurement, so it reduces information bias.  
322 The limitation of this study is an institution based study it does not address the general  
323 community and the study doesn't incorporate laboratorial investigations like RFT, LFT,  
324 Bilirubin count etc.

## 325 **7. Conclusion**

326 In this study, the magnitude of hypoglycemia was 16.6% which is high. The result of this study  
327 proved that maternal DM, delayed initiation feeding, hypothermia and perinatal asphyxia were  
328 associated with the increasing risk of neonatal hypoglycemia. Therefore, early initiation of  
329 feeding is an important factor to prevent hypoglycemia for all newborns. On the other hand,  
330 preventing, early detection and management of hypoglycemia should be done in neonates with  
331 hypothermia and perinatal asphyxia.

## 332 **8. Acknowledgment**

333 We the authors acknowledged study participants, data collectors, supervisors, Hawassa City  
334 Administration Health Bureau, and public hospitals for feeding the necessary information and  
335 their unwavering efforts in the research process. Moreover, we appreciate Hawassa University to  
336 pursue this chance to conduct this research and Dilla University for covering the data collection  
337 cost.

338



## 339 9. Reference

- 340 1. stanford m. Hypoglycemia in a Newborn Baby 2023 [cited 2023 march, 2]. Available  
341 from: [https://www.stanfordchildrens.org/en/topic/default?id=hypoglycemia-in-the-](https://www.stanfordchildrens.org/en/topic/default?id=hypoglycemia-in-the-newborn-90-P01961)  
342 [newborn-90-P01961](https://www.stanfordchildrens.org/en/topic/default?id=hypoglycemia-in-the-newborn-90-P01961).
- 343 2. Dixon KC, Ferris RL, Marikar D, Chong M, Mittal A, Manikam L, et al. Definition and  
344 monitoring of neonatal hypoglycaemia: a nationwide survey of NHS England Neonatal  
345 Units. Archives of Disease in Childhood-Fetal and Neonatal Edition. 2017;102(1):F92-F3.
- 346 3. Harris DL, Weston PJ, Battin MR, Harding JE. A survey of the management of neonatal  
347 hypoglycaemia within the Australian and New Zealand Neonatal Network. Journal of  
348 Paediatrics and Child Health. 2014;50(10):E55-E62.
- 349 4. EMOH. neonatal intensive care unit management protocol2021.
- 350 5. Stanescu A, Stoicescu S. Neonatal hypoglycemia screening in newborns from diabetic  
351 mothers-Arguments and controversies. Journal of medicine and life. 2014;7(Spec Iss  
352 3):51.
- 353 6. Mukunya D, Odongkara B, Piloya T, Nankabirwa V, Achora V, Batte C, et al. Prevalence  
354 and factors associated with neonatal hypoglycemia in Northern Uganda: a community-  
355 based cross-sectional study. Tropical Medicine and Health. 2020;48(1):1-8.
- 356 7. Hay WW, Raju TN, Higgins RD, Kalhan SC, Devaskar SU. Knowledge gaps and research  
357 needs for understanding and treating neonatal hypoglycemia: workshop report from  
358 Eunice Kennedy Shriver National Institute of Child Health and Human Development. The  
359 Journal of pediatrics. 2009;155(5):612-7.
- 360 8. Harding JE, Harris DL, Hegarty JE, Alsweiler JM, McKinlay CJ. An emerging evidence  
361 base for the management of neonatal hypoglycaemia. Early human development.  
362 2017;104:51-6.
- 363 9. Shah R, Harding J, Brown J, McKinlay C. Neonatal Glycaemia and Neurodevelopmental  
364 Outcomes: A Systematic Review and Meta-Analysis. Neonatology. 2019;115(2):116-26.
- 365 10. Dedeke I, Okeniyi J, Owa J, Oyedeji G. Point-of-admission neonatal hypoglycaemia in a  
366 Nigerian tertiary hospital: incidence, risk factors and outcome. Nigerian Journal of  
367 Paediatrics. 2011;38(2):90-4.
- 368 11. Sertsu A, Nigussie K, Eyeberu A, Tibebe A, Negash A, Getachew T, et al. Determinants  
369 of neonatal hypoglycemia among neonates admitted at Hiwot Fana Comprehensive

- 370 Specialized University Hospital, Eastern Ethiopia: A retrospective cross-sectional study.  
371 SAGE Open Medicine. 2022;10:20503121221141801.
- 372 12. Fantahun BY, Nurussen I. Prevalence and Risk factors of Hypoglycaemia in Neonates at  
373 St. Paul's Hospital Millennium Medical College Neonatal Intensive Care Unit, Ethiopia:  
374 A Cross Sectional Study. 2020.
- 375 13. Amponsah G, Hagan O, Okai E. Neonatal Hypoglycaemia at Cape Coast Teaching  
376 Hospital. *Journal of the West African College of Surgeons*. 2015;5(2):100.
- 377 14. HUCSHHR hucshhr. Number of serving population and staff profile. 2023.
- 378 15. AGHHR aghhr. Number of serving population and staff profile. 2023.
- 379 16. TPHHR TpH. Number of serving population and staff profile. 2023.
- 380 17. Fikirte Kasaye RM, Kerebih Abere. Prevalence and predictors of hypoglycemia among  
381 neonates on admission to NICU in Addis Ababa public Hospitals, Addis Ababa, Ethiopia,  
382 2021. Addis abeba university repository 2021.
- 383 18. Meyur R, Sadhu A, Bhakta A, Bandyopadhyay M, Kundu B, Bhaumik S, et al.  
384 INCIDENCE & CAUSES OF NEONATAL HYPOGLYCEMIA AFTER CESAREAN  
385 SECTION IN A RURAL SETUP OF WEST BENGAL. *Journal of Evolution of medical  
386 and Dental Sciences*. 2014;3:1191-4.
- 387 19. Singh YP, Devi TR, Gangte D, Devi TI, Singh NN, Singh MA. Hypoglycemia in newborn  
388 in Manipur. *Journal of Medical Society*. 2014;28(2):108-11.
- 389 20. Hosagasi NH, Aydin M, Zenciroglu A, Ustun N, Beken S. Incidence of hypoglycemia in  
390 newborns at risk and an audit of the 2011 American academy of pediatrics guideline for  
391 hypoglycemia. *Pediatrics & Neonatology*. 2018;59(4):368-74.
- 392 21. Babu M, D'Souza J, Susheela C. Study of incidence, clinical profile and risk factors of  
393 neonatal hypoglycemia in a tertiary care hospital. *Int J Pediatr Res*. 2016;3(10):753.
- 394 22. Ochoga MO, Aondoaseer M, Abah RO, Ogbu O, Ejeliogu EU, Tolough GI. Prevalence of  
395 Hypoglycaemia in Newborn at Benue State University Teaching Hospital, Makurdi,  
396 Benue State, Nigeria. *Open Journal of Pediatrics*. 2018;8(2):189-98.
- 397 23. Sambany E, Pussard E, Rajaonarivo C, Raobijaona H, Barennes H. Childhood  
398 dysglycemia: prevalence and outcome in a referral hospital. *PloS one*. 2013;8(5):e65193.
- 399 24. Zhao T, Liu Q, Zhou M, Dai W, Xu Y, Kuang L, et al. Identifying risk effectors involved  
400 in neonatal hypoglycemia occurrence. *Bioscience Reports*. 2020;40(3).

- 401 25. Magadla Y, Velaphi S, Moosa F. Incidence of hypoglycaemia in late preterm and term  
402 infants born to women with diabetes mellitus. *South African Journal of Child Health*.  
403 2019;13(2):78-83.
- 404 26. Hassan M, Pervez A, Biswas R, Debnath S, Syfullah K. Incidence and Risk Factors of  
405 Neonatal Hypoglycemia During the First 48 Hours of Life in a Tertiary Level Hospital.  
406 *Faridpur Medical College Journal*. 2020;15:12-5.
- 407 27. Bamehrez M. Hypoglycemia and associated comorbidities among newborns of mothers  
408 with diabetes in an academic tertiary care center. *Frontiers in Pediatrics*. 2023;11.
- 409 28. Yunarto Y, Sarosa GI. Risk factors of neonatal hypoglycemia. *Paediatrica Indonesiana*.  
410 2019;59(5):252-6.
- 411 29. Bromiker R, Perry A, Kasirer Y, Einav S, Klinger G, Levy-Khademi F. Early neonatal  
412 hypoglycemia: incidence of and risk factors. A cohort study using universal point of care  
413 screening. *The Journal of Maternal-Fetal & Neonatal Medicine*. 2019;32(5):786-92.
- 414 30. Zhou W, Yu J, Wu Y, Zhang H. Hypoglycemia incidence and risk factors assessment in  
415 hospitalized neonates. *The Journal of Maternal-Fetal & Neonatal Medicine*.  
416 2015;28(4):422-5.
- 417 31. Chandran S, Samuel Rajadurai V, Alim Abdul Haium A, Hussain K. Current perspectives  
418 on neonatal hypoglycemia, its management, and cerebral injury risk. *Research and reports*  
419 *in Neonatology*. 2015:17-30.
- 420 32. Senadhi V, Dutta S. Recurrent Hypothermia and Hypoglycemia as the Initial Presentation  
421 of Hepatitis C: 724. *Official journal of the American College of Gastroenterology | ACG*.  
422 2010;105:S262.
- 423 33. Cordero L, Stenger MR, Landon MB, Nankervis CA. Early feeding, hypoglycemia and  
424 breastfeeding initiation in infants born to women with pregestational diabetes mellitus. *J*  
425 *Neonatal Perinatal Med*. 2018;11(4):357-64.

426

# HYPOGLYCEMIA

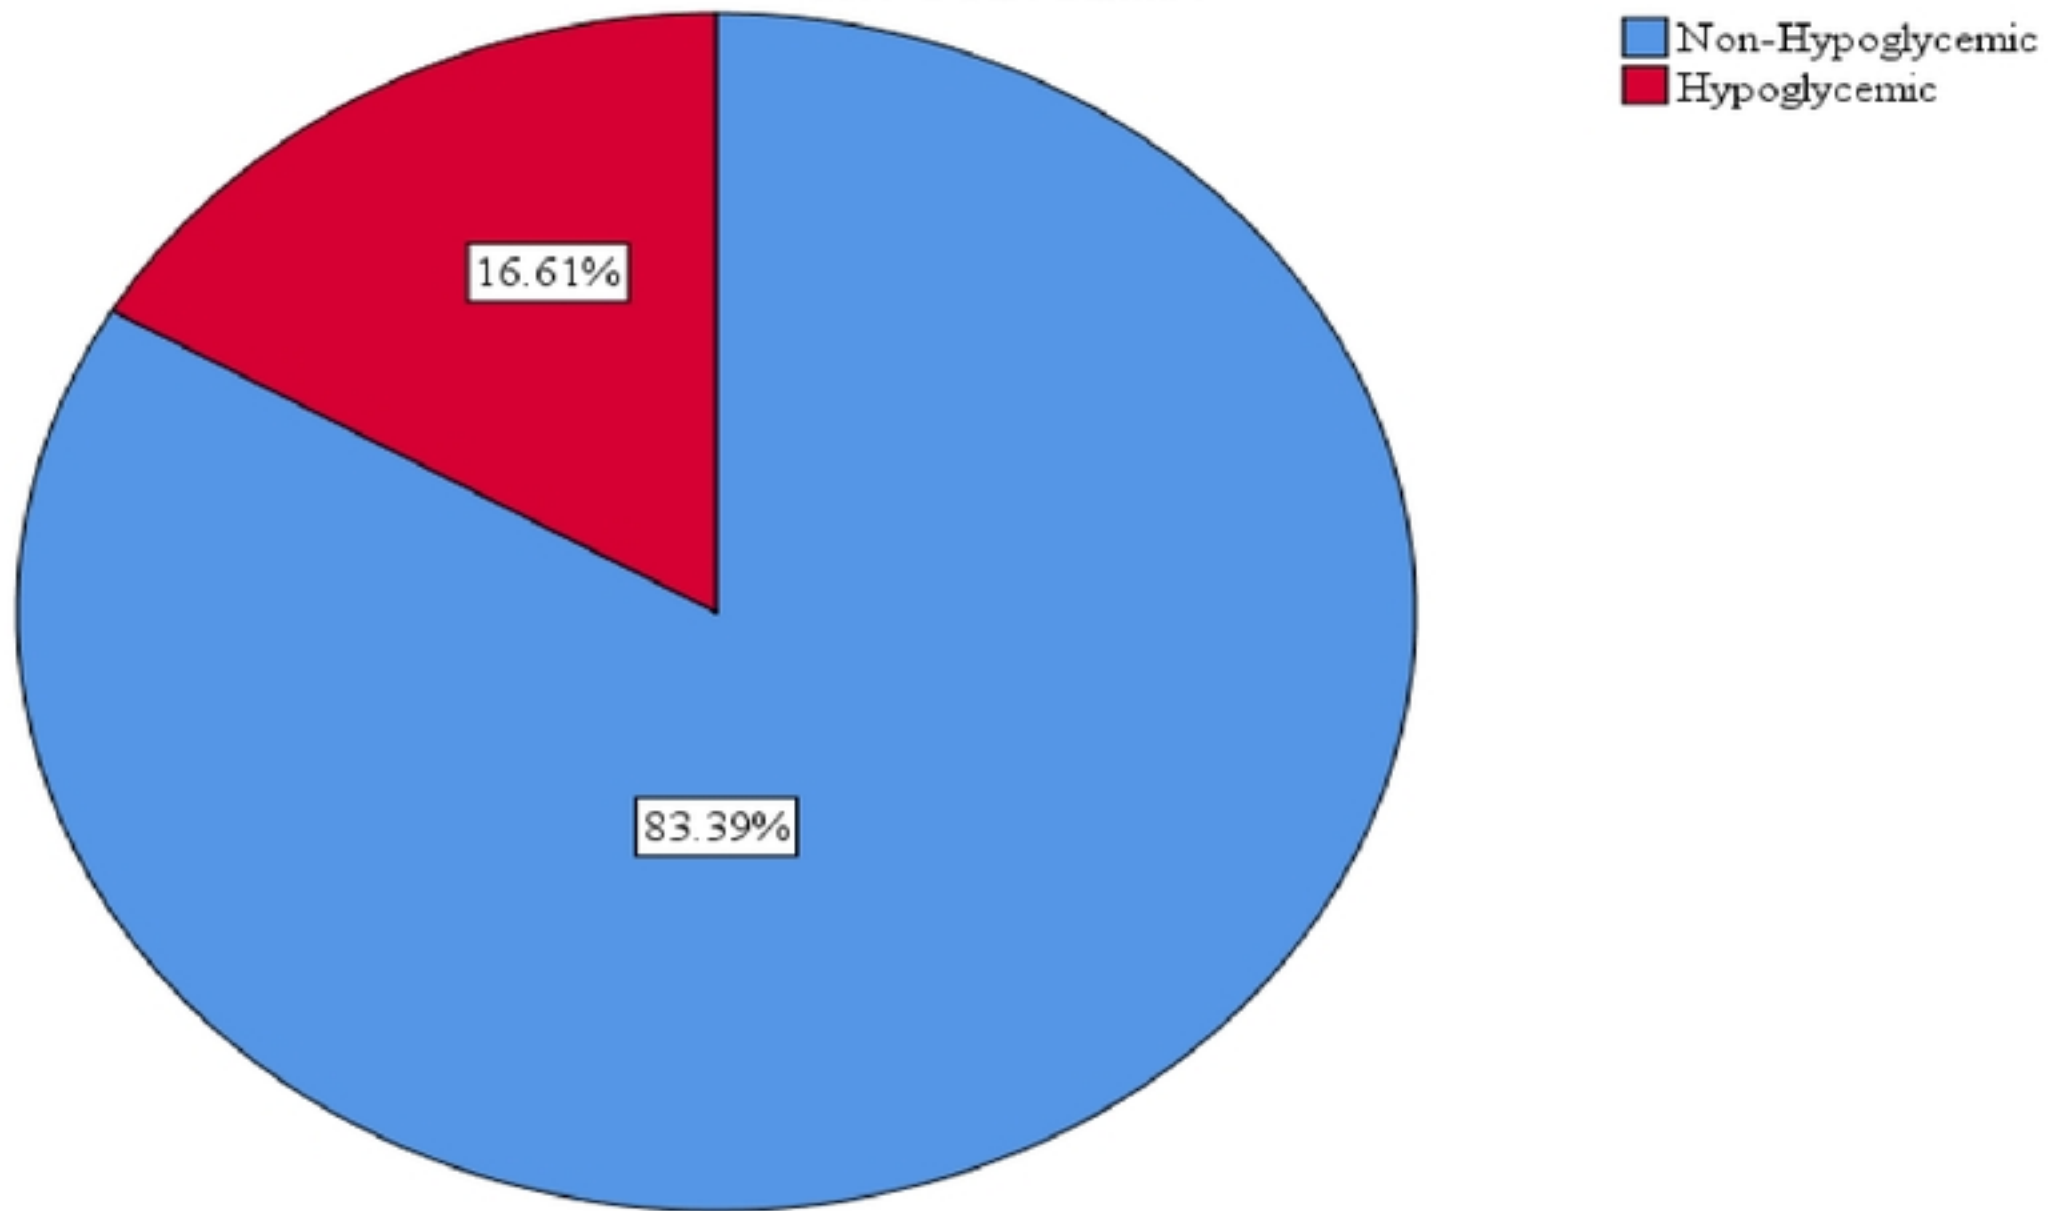

**Figure 1.** The magnitude of hypoglycemia among neonates on admission to neonatal intensive care units in Hawassa City Public Hospitals, Ethiopia 2023. (n=271)

Figure
